# Supplementary material
Source: PubMed Central journal article supplement (PMC9938865)
Supplement: 42003_2023_4570_MOESM1_ESM.pdf [file 42003_2023_4570_MOESM1_ESM.pdf]

1

2

3

4 **Supplementary Information for**

5

6 **Structural insights into ribonucleoprotein dissociation by nucleocapsid**  
7 **protein interacting with non-structural protein 3 in SARS-CoV-2**

8

9 Xincheng Ni, Yinze Han, Renjie Zhou, Yanmei Zhou, Jian Lei\*

10 \*Corresponding author. Email: leijian@scu.edu.cn

11

12 **This file includes:**

13 Supplementary Figures 1–6

14 Supplementary Tables 1–3

15 References 1–3

16

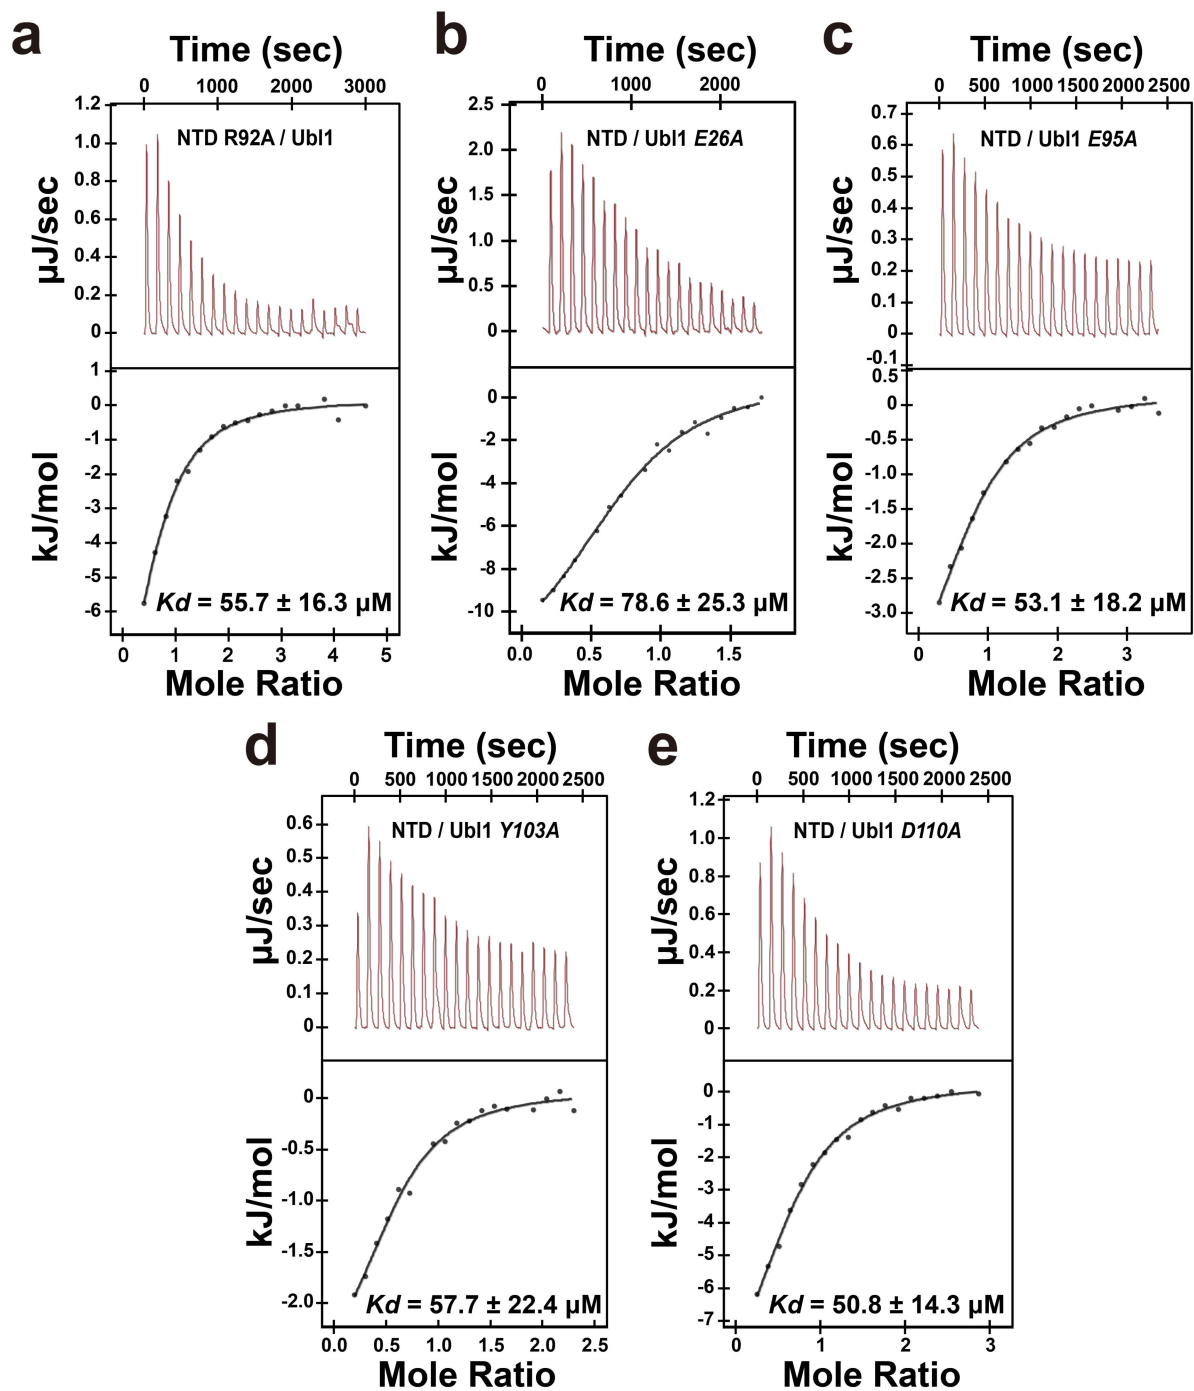

17

18 **Supplementary Fig. 1. Affinity measurements of SARS-CoV-2 NTD and Ubl1 mutations.**

19 **a** Affinity between NTD R92A and Ubl1. **b-e** Affinity between NTD and Ubl1 *E26A* (**b**),

20 *E95A* (**c**), *Y103A* (**d**), and *D110A* (**e**). The raw calorimetric curve is shown in the top panel,

21 while the fitted binding isotherm curve is displayed in the bottom panel. *Kd*: dissociation

22 constant.

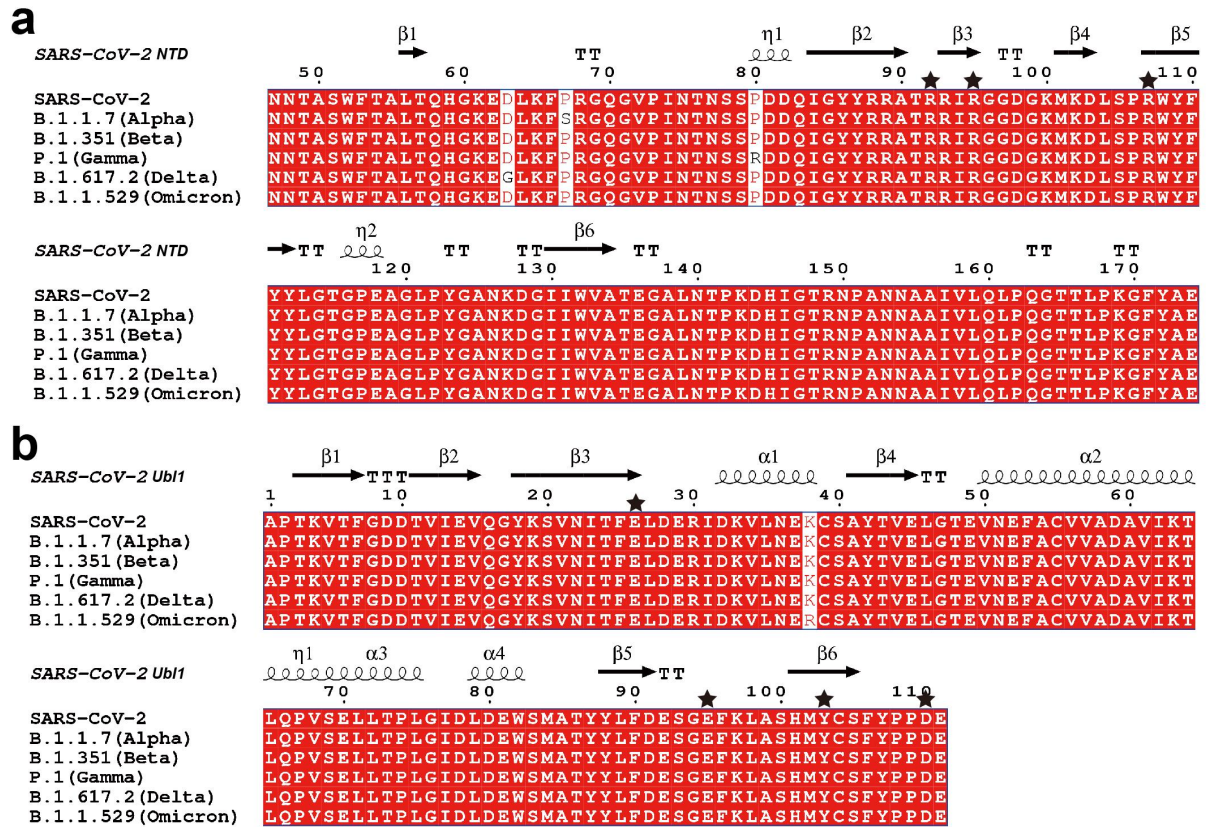

23

24

25

26

27

28

29

30

31

**Supplementary Fig. 2. Structure-based multiple sequence alignment of NTD (a) and Ubl1 (b) in SARS-CoV-2 and its variant strains.** The corresponding sequence accession numbers are: SARS-CoV-2, GenBank: NC\_045512.2; B.1.1.7, GenBank: MZ622698; B.1.351, GenBank: MZ433432; P.1, GenBank: MZ477759; B.1.617.2, GenBank: OK091006; B.1.1.529, GenBank: OL672836. The secondary structures of SARS-CoV-2 NTD (PDB code: 7VNU) and Ubl1 (chain B) in NTD-Ubl1 complex (PDB code: 7WZO) are indicated. Residues R92, R95, R107 of NTD and E26, E95, Y103, D110 of Ubl1 are labeled with black stars. Figures (a and b) were prepared by the program ESPrift<sup>1</sup>.

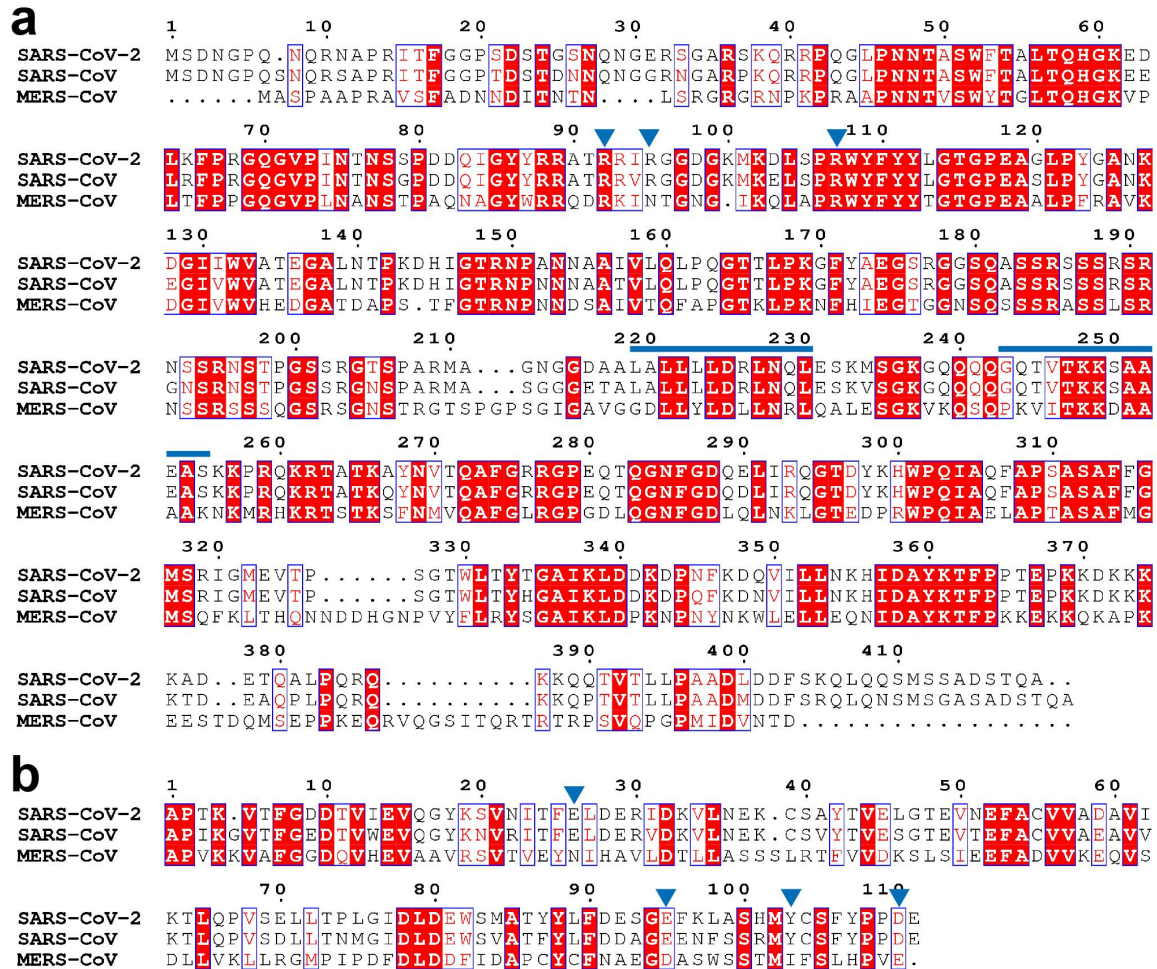

32

33 **Supplementary Fig. 3. Multiple sequence alignment of N protein (a) and Ubl1 (b) among**  
 34 **SARS-CoV-2, SARS-CoV and MERS-CoV.** The sequence accession numbers are:  
 35 SARS-CoV-2, GenBank: NC\_045512.2; SARS-CoV, GenBank: NC\_004718.3; MERS-CoV,  
 36 GenBank: NC\_019843.3. Key residues for SARS-CoV-2 NTD-Ubl1 interaction are marked  
 37 by blue-triangle arrows. Two Ubl1-binding motifs<sup>2</sup> (<sup>219</sup>LALLLLDRLNQL<sup>230</sup> and  
 38 <sup>243</sup>GQTVTKKSAAEAS<sup>255</sup>) of SARS-CoV-2 N-LKR are indicated by the blue lines. Figures  
 39 (a and b) were generated using the program ESPrIPT<sup>1</sup>.

40

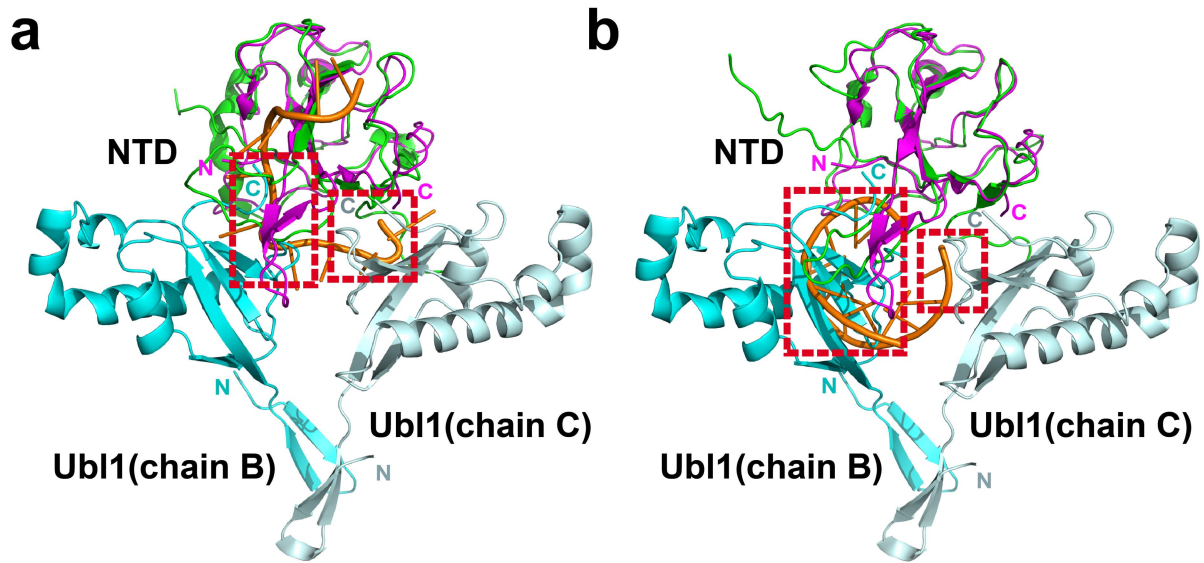

41

42 **Supplementary Fig. 4. Overlapping region between Ubl1- and (ss/ds) RNA- binding site**

43 **of SARS-CoV-2 N protein. a** Superimposing the NTD-ssRNA complex structure<sup>3</sup> (PDB

44 code: 7ACT) to our NTD-Ubl1 complex structure (PDB code: 7WZO). **b** Superimposing the

45 NTD-dsRNA complex structure<sup>3</sup> (PDB code: 7ACS) to our crystal structure. NTD of the

46 NTD-Ubl1 complex is shown in magenta. While NTD in the NTD-(ds/ss) RNA complex is

47 displayed in green. Chain-B Ubl1 and chain-C Ubl1 are colored in cyan and light blue,

48 respectively. The N- and C- termini of NTD and Ubl1s are labeled in the corresponding

49 colors. Both the ssRNA and dsRNA are colored in orange. The overlapping regions between

50 Ubl1s and (ss/ds) RNA are indicated by red dashed boxes. Figures (**a** and **b**) were prepared

51 using PyMOL (<https://pymol.org>).

52

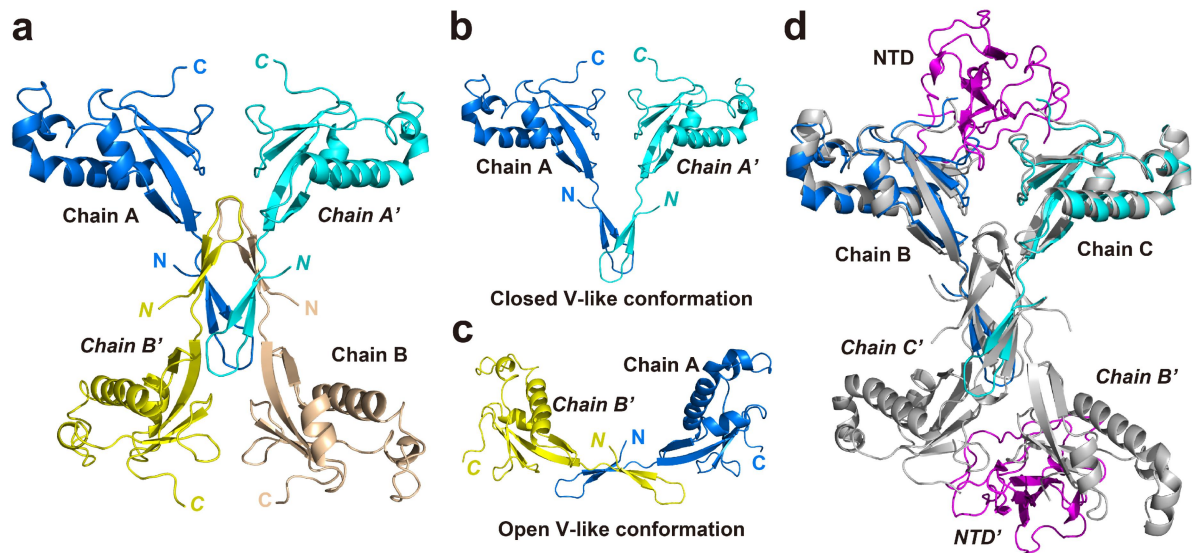

53

54 **Supplementary Fig. 5. Two different conformations of the potential dimeric Ub11 in the**

55 **crystal structure. a** A “closed V-like” (Chain A and A’) and an “open V-like” (Chain A and

56 B’) conformations forming by the symmetry-related Ub11s in the crystal structure of

57 SARS-CoV-2 Ub11 (PDB code: 7KAG). Ub11 chain A, chain B, and their symmetrical

58 protomers are colored in blue, brown, cyan, and yellow, respectively. **b** The “closed V-like”

59 conformation of dimeric Ub11. **c** The “open V-like” conformation of dimeric Ub11. **d**

60 Superimposing the dimeric “closed V-like” Ub11 structure to our NTD-Ub11 complex

61 structure (PDB code: 7WZO). The Ub11s in the NTD-Ub11 complex and their symmetrical

62 molecules are colored in gray. The NTD and its symmetrical protomer are displayed in

63 magenta. Figures (**a-d**) were prepared using PyMOL (<https://pymol.org>).

64

65

66

**a**

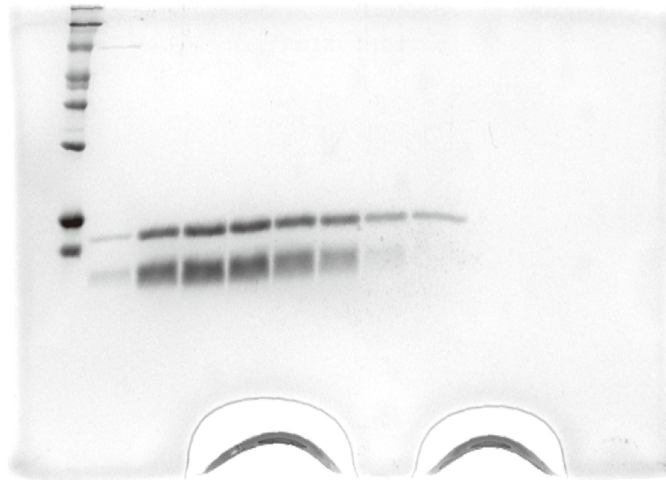

**b**

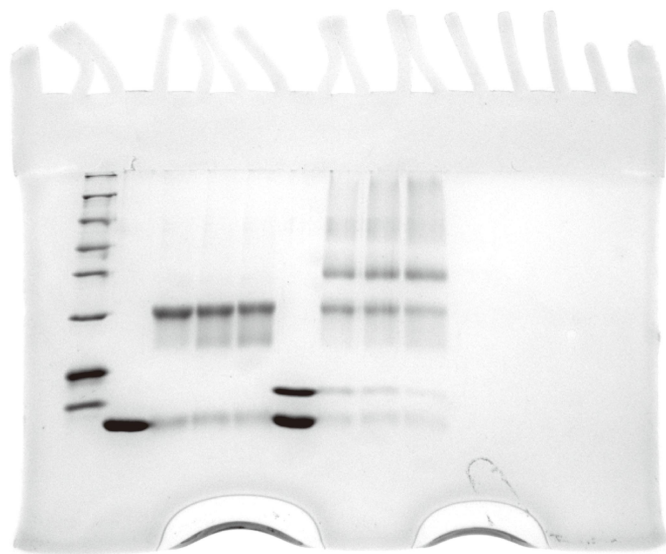

**c**

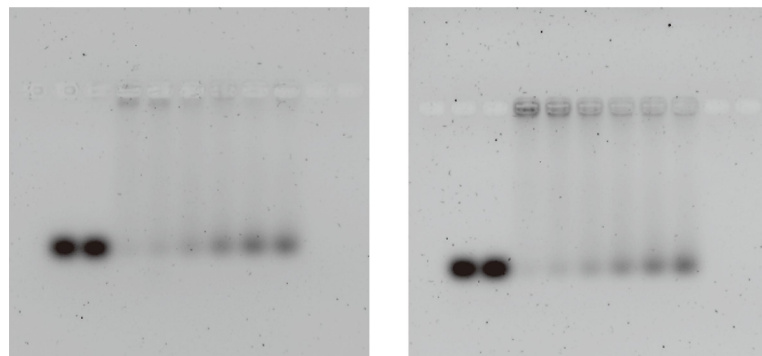

**17mer ssRNA**

**17mer ssDNA**

67 **Supplementary Fig. 6. Uncropped Gels. a** Unedited gel used in Figure 3a. **b** Unedited gel

68 used in Figure 3d. **c** Unedited gels used in Figure 6a.

69

70 **Supplementary Table 1. Primers used for SARS-CoV-2 *N*, *Nsp3* and truncated *Nsp3* in**  
71 **the fluorescence assay.**

72

| <b>Gene</b>                             | <b>Forward primer (5' to 3')</b>                                   | <b>Reverse primer (5' to 3')</b>           |
|-----------------------------------------|--------------------------------------------------------------------|--------------------------------------------|
| <i>N protein</i><br>(1–419)             | ACTCACTATAGGGAGACCCAT<br>GTCTGATAATGGAC                            | CGTATGGGTACCCGGGCAT<br>GGCCTGAGTTGAGTCAGCA |
| <i>Nsp3.1</i><br>(1–654)                | TCTATATAAGCAGAGCTCGTA<br>TGGCGCCGACCAAAGTGA                        | CGGCACCTTCAGGCTACGC<br>ATGTAACGAGCCGCTTCC  |
| <i>Nsp3.2</i><br>(649–1304)             | GAGCTCCTTATGGCCTCTAGA<br>CGTAGCCTGAAGGTGCCG                        | CAGGGTTTTTCAGACCCAGC<br>ACACGGCTCAGCTCGTT  |
| <i>Nsp3.3</i><br>(1299–1945)            | CGAGCTCCTTATGGCCTCTAG<br>ACTCGAGGGTGGAAAGCTTCT<br>GGGTCTGAAAACCCTG | GGAATTCGGCCACCCTTCA<br>GAGCGAT             |
| <i>Nsp3<sup>Δ111</sup></i><br>(112–645) | TCTATATAAGCAGAGCTCGTA<br>TGGACGAGGAAGAGGGTGAC                      | CGGCACCTTCAGGCTACGC<br>ATGTAACGAGCCGCTTCC  |
| <i>Nsp3<sup>Δ168</sup></i><br>(169–645) | TCTATATAAGCAGAGCTCGTA<br>TGACCGTGGGCCAGCAGGAT                      | CGGCACCTTCAGGCTACGC<br>ATGTAACGAGCCGCTTCC  |
| <i>Ubl1</i><br>(1–111)                  | TCTATATAAGCAGAGCTCGTA<br>TGGCGCCGACCAAAGTGA                        | CTTGCTCACCAGAATTCGT<br>TCATCCGGGTAGAAG     |

73



74 **Supplementary Table 2. Primers used for SARS-CoV-2 *N*, *N* truncations and *Ubl1*.**

| Gene                            | Forward primer (5' to 3')                                       | Reverse primer (5' to 3')                           |
|---------------------------------|-----------------------------------------------------------------|-----------------------------------------------------|
| <i>N</i> protein<br>(1–419)     | CTAGCTAGCGAAAACCTG<br>TATTTTCAGGGCATGTCTG<br>ATAATGGACCCCAAAATC | CGCGGATCCTTAGGCCTGA<br>GTTGAGTCAGCACTGC             |
| <i>N-arm-NTD-LKR</i><br>(1–247) | CTAGCTAGCATGTCTGAT<br>AATGGACCCCAAAATC                          | CGCGGATCCTTAAGTGACA<br>GTTTGGCCTTGTTG               |
| <i>NTD-LKR</i><br>(47–247)      | CTAGCTAGCAATAATACT<br>GCGTCTTGGTTCACCGC                         | CGCGGATCCTTAAGTGACA<br>GTTTGGCCTTGTTGTTG            |
| <i>NTD</i><br>(47–174)          | CTAGCTAGCAATAATACT<br>GCGTCTTGGTTCACC                           | CGCGGATCCTTATTCTGCG<br>TAGAAGCCTTTTGG               |
| <i>CTD-C-tail</i><br>(248–419)  | CTAGCTAGCAAGAAATCT<br>GCTGCTGAGGCTTC                            | CCGCTCGAGTTAGGCCTGA<br>GTTGAGTCAGCAC                |
| <i>Ubl1</i><br>(1–111)          | CGCCATATGGCGCCGACC<br>AAAGTGACCTTCGGTG                          | CCGCTCGAGTTATTATTCA<br>TCCGGCGGGTAGAAGCTG<br>CAGTAC |

76 **Supplementary Table 3. Primers used for SARS-CoV-2 NTD and Ubl1 mutations.**

77

| Gene              | Forward primer (5' to 3')                | Reverse primer (5' to 3')                 |
|-------------------|------------------------------------------|-------------------------------------------|
| <i>NTD R92A</i>   | TACCGAAGAGCTACCGCGCG<br>AATTCGTG         | CGCGGTAGCTCTTCGGTAGT<br>AGCCAAT           |
| <i>Ubl1 E26A</i>  | GAGCGTGAACATCACCTTCGC<br>GCTGGATGAACGTAT | TGTCGATACGTTTCATCCAGC<br>GCGAAGGTGATGTTCA |
| <i>Ubl1 E95A</i>  | TTCGATGAGAGCGGCGCGTTC<br>AAGCTGG         | CGCGCCGCTCTCATCGAACA<br>GGTAGTAG          |
| <i>Ubl1 Y103A</i> | CAAGCTGGCGAGCCACATGG<br>CCTGCAGCTTCTACCC | CCGGCGGGTAGAAGCTGCA<br>GGCCATGTGGCTCGCCA  |
| <i>Ubl1 D110A</i> | CGCCATATGGCGCCGACCAA<br>AGTGACCTTCGGTG   | CCGCTCGAGTTATTCCGCCG<br>GCGGGTAGAAGCTGCAG |

78

79 **References**

- 80 1. Gouet, P., Courcelle, E., Stuart, D. I., & Métoz, F. ESPript: analysis of multiple sequence  
81 alignments in PostScript. *Bioinformatics* **15**, 305–308 (1999).
- 82 2. Bessa, L. M. et al. The intrinsically disordered SARS-CoV-2 nucleoprotein in dynamic  
83 complex with its viral partner nsp3a. *Sci. Adv.* **8**, eabm4034 (2022).
- 84 3. Dinesh, D. C. et al. Structural basis of RNA recognition by the SARS-CoV-2  
85 nucleocapsid phosphoprotein. *PLoS Pathog.* **16**, e1009100 (2020).

86
