# Supplementary material
Source: PubMed Central journal article supplement (PMC9938865)
Supplement: 42003_2023_4570_MOESM2_ESM.pdf [file 42003_2023_4570_MOESM2_ESM.pdf]

## Reporting Summary

Nature Research wishes to improve the reproducibility of the work that we publish. This form provides structure for consistency and transparency in reporting. For further information on Nature Research policies, see our [Editorial Policies](#) and the [Editorial Policy Checklist](#).

### Statistics

For all statistical analyses, confirm that the following items are present in the figure legend, table legend, main text, or Methods section.

n/a Confirmed

- The exact sample size ( $n$ ) for each experimental group/condition, given as a discrete number and unit of measurement
- A statement on whether measurements were taken from distinct samples or whether the same sample was measured repeatedly
- The statistical test(s) used AND whether they are one- or two-sided  
*Only common tests should be described solely by name; describe more complex techniques in the Methods section.*
- A description of all covariates tested
- A description of any assumptions or corrections, such as tests of normality and adjustment for multiple comparisons
- A full description of the statistical parameters including central tendency (e.g. means) or other basic estimates (e.g. regression coefficient) AND variation (e.g. standard deviation) or associated estimates of uncertainty (e.g. confidence intervals)
- For null hypothesis testing, the test statistic (e.g.  $F$ ,  $t$ ,  $r$ ) with confidence intervals, effect sizes, degrees of freedom and  $P$  value noted  
*Give  $P$  values as exact values whenever suitable.*
- For Bayesian analysis, information on the choice of priors and Markov chain Monte Carlo settings
- For hierarchical and complex designs, identification of the appropriate level for tests and full reporting of outcomes
- Estimates of effect sizes (e.g. Cohen's  $d$ , Pearson's  $r$ ), indicating how they were calculated

*Our web collection on [statistics for biologists](#) contains articles on many of the points above.*

### Software and code

Policy information about [availability of computer code](#)

**Data collection** ÅKTA pure 25 L1 (Cytiva, USA); Olympus SpinSR10 (Olympus Corporation, Japan); Nano ITC-Low Volume (TA instrument, USA); DynaPro NanoStar (Wyatt Technology, USA); DAWN and Optilab (Wyatt Technology, USA); Monolith NT.115 (NanoTemper Technologies, Germany); SSRF (BL19U1, Shanghai, China).

**Data analysis** UNICORN (Version 7.1, Build 7.1.0.378); OLYMPUS cellSens Dimension (Version 3.1, Build 21199); NanoAnalyze Data Analysis (Version 3.8.0); ASTRA 8 (Version 8.1.0.14); DYNAMICS (Version 8.0.0.89); MO.Affinity Analysis (Version 2.3); XDS (version 20200131); CCP4 (including Aimless, MOLREP and REFMAC5) (version 7.0.078); Coot (version 0.8.9.2); Phenix (refine) (Version 1.18.2\_3874); Chimera (version 1.11.2); Pymol (version 2.4.0).

For manuscripts utilizing custom algorithms or software that are central to the research but not yet described in published literature, software must be made available to editors and reviewers. We strongly encourage code deposition in a community repository (e.g. GitHub). See the Nature Research [guidelines for submitting code & software](#) for further information.

### Data

Policy information about [availability of data](#)

All manuscripts must include a [data availability statement](#). This statement should provide the following information, where applicable:

- Accession codes, unique identifiers, or web links for publicly available datasets
- A list of figures that have associated raw data
- A description of any restrictions on data availability

Atomic coordinates and structure factors for SARS-CoV-2 N-NTD and NTD-Ubl1 complex have been deposited in the Protein Data Bank (<https://www1.rcsb.org/>) with the accession codes 7VNU and 7WZO. SARS-CoV-2, GenBank: NC\_045512.2; B.1.1.7, GenBank: MZ622698; B.1.351, GenBank: MZ433432; P.1, GenBank: MZ477759; B.1.617.2, GenBank: OK091006; B.1.1.529, GenBank: OL672836. SARS-CoV, GenBank: NC\_004718.3; MERS-CoV, GenBank: NC\_019843.3.

## Field-specific reporting

Please select the one below that is the best fit for your research. If you are not sure, read the appropriate sections before making your selection.

Life sciences       Behavioural & social sciences       Ecological, evolutionary & environmental sciences

For a reference copy of the document with all sections, see [nature.com/documents/nr-reporting-summary-flat.pdf](https://www.nature.com/documents/nr-reporting-summary-flat.pdf)

## Life sciences study design

All studies must disclose on these points even when the disclosure is negative.

|                 |                                                                                                                                              |
|-----------------|----------------------------------------------------------------------------------------------------------------------------------------------|
| Sample size     | <input type="text" value="The protein size was evaluated by analytical size-exclusion chromatography and dynamic light scattering assays."/> |
| Data exclusions | <input type="text" value="No data were excluded from the analyses."/>                                                                        |
| Replication     | <input type="text" value="All attempts at replication were successful."/>                                                                    |
| Randomization   | <input type="text" value="The same samples were allocated into experimental groups randomly."/>                                              |
| Blinding        | <input type="text" value="The investigators were blinded to group allocation during data collection and/or analysis."/>                      |

## Reporting for specific materials, systems and methods

We require information from authors about some types of materials, experimental systems and methods used in many studies. Here, indicate whether each material, system or method listed is relevant to your study. If you are not sure if a list item applies to your research, read the appropriate section before selecting a response.

### Materials & experimental systems

### Methods

| n/a                                 | Involvement in the study                                  |
|-------------------------------------|-----------------------------------------------------------|
| <input checked="" type="checkbox"/> | <input type="checkbox"/> Antibodies                       |
| <input type="checkbox"/>            | <input checked="" type="checkbox"/> Eukaryotic cell lines |
| <input checked="" type="checkbox"/> | <input type="checkbox"/> Palaeontology and archaeology    |
| <input checked="" type="checkbox"/> | <input type="checkbox"/> Animals and other organisms      |
| <input checked="" type="checkbox"/> | <input type="checkbox"/> Human research participants      |
| <input checked="" type="checkbox"/> | <input type="checkbox"/> Clinical data                    |
| <input checked="" type="checkbox"/> | <input type="checkbox"/> Dual use research of concern     |

| n/a                                 | Involvement in the study                        |
|-------------------------------------|-------------------------------------------------|
| <input checked="" type="checkbox"/> | <input type="checkbox"/> ChIP-seq               |
| <input checked="" type="checkbox"/> | <input type="checkbox"/> Flow cytometry         |
| <input checked="" type="checkbox"/> | <input type="checkbox"/> MRI-based neuroimaging |

## Eukaryotic cell lines

Policy information about [cell lines](#)

|                                                                      |                                                                                                                            |
|----------------------------------------------------------------------|----------------------------------------------------------------------------------------------------------------------------|
| Cell line source(s)                                                  | <input type="text" value="Huh-7 cells were purchased from Thermo Fisher Scientific, China."/>                              |
| Authentication                                                       | <input type="text" value="Huh-7 cell line was commercially available and has not been authenticated after receiving it."/> |
| Mycoplasma contamination                                             | <input type="text" value="We confirmed that Huh-7 cell line tested negative for mycoplasma contamination."/>               |
| Commonly misidentified lines<br>(See <a href="#">ICLAC</a> register) | <input type="text" value="No commonly misidentified cell lines were used."/>                                               |
